# Supplementary material
Source: publisher figshare collection journal article supplement (https://aacr.figshare.com/articles/dataset/_/22430103)
Supplement: Supplementary file 1 [file 39876435]

1 **Supplementary Figure Legends**

2 **Supplementary Figure 1. Correlation of IL-8 expression with overall survival in multiple**  
3 **cancers.**

4 Kaplan-Meier analysis of the correlation of IL-8 expression with overall survival in the  
5 GEPIA website. Group cutoff: high > 75%, low < 25%. CESC: low n=73, high n=73; KIRC  
6 low n=129, high n=129; LUAD: low n=120, high n=120; ACC: low n=18, high n=19; ESCA:  
7 low n=46, high n=46; UAM: low n=16, high n=20; BLCA: low n=101, high n=101; GBM:  
8 low n=41, high n=41; SARC: low n=66, high n=66.

9 **Supplementary Figure 2. HBV induces IL-8 expression mainly through HBx.**

10 (A-C) qRT-PCR analysis of HBV total RNA expression in (A) HepG2-hNTCP cells infected  
11 with or without HBV for 5 days (dpi), (B) HepAD38 cells cultured in medium with or without  
12 tetracycline for 7 days and (C) HepG2.2.15 cells transfected with HBV siRNA for 48h. (D)  
13 qRT-PCR analysis of *IL-8* expression in HEK293T cells transfected with empty vector or  
14 HBV coding genes (HBC, L-HBs and HBx) for 48h. (Data are presented as mean ± SEM.  
15 Student's t test \*\*\*p<0.001)

16

17 **Supplementary Figure 3. Construction of IL-8 and CXCR1 overexpressed stable cell**  
18 **lines.**

19 (A) qRT-PCR analysis of *IL-8* expression in PVTT cells stably transfected with empty control  
20 (vector) and human IL-8 expression plasmid (IL-8). (B) qRT-PCR analysis of *IL-8* expression  
21 in mouse B16F10 cells stably transfected with empty control (vector) and human IL-8  
22 expression plasmid (IL-8), data are represented as  $\Delta$ CT. (C) qRT-PCR analysis of *CXCR1*  
23 expression in HUVEC endothelial cells stably transfected with empty control (vector) and  
24 human CXCR1 expression plasmid (CXCR1).

25

26 **Supplementary Figure 4. IL-8-CXCR1 axis has no effect on immune cell infiltration in**  
27 **lung and spleen.**

28 (A-E) IL-8 overexpressed B16F10 cells were inoculated intravenously into control and  
29 hCXCR1<sup>tg</sup> mice (control mice n=2, hCXCR1<sup>tg</sup> mice n=3). The lungs and spleens were  
30 collected after 2 weeks. Percentage of (A)Tregs (CD25<sup>+</sup>FoxP3<sup>+</sup>), (B) Macrophages  
31 (CD11b<sup>+</sup>F4/80<sup>+</sup>Ly6G<sup>-</sup>), (C) MDSCs (CD11b<sup>+</sup>F4/80<sup>-</sup>Ly6G<sup>+</sup>), (D) CD4<sup>+</sup> T cells, and (E) CD8<sup>+</sup>  
32 T cells in the lung and spleen of control and hCXCR1<sup>tg</sup> mice were determined by flow  
33 cytometry.

34 **Supplementary Figure 5. IL-8-CXCR1 axis creates an immunosuppressive**  
35 **microenvironment in the liver.**

36 (A-E) IL-8 overexpressed B16F10 cells were inoculated intravenously into control mice and  
37 CXCR1 mice (n=4 in each group). The livers, spleens and lungs were collected after 3 weeks.  
38 Percentage of (A)Tregs (CD25<sup>+</sup>FoxP3<sup>+</sup>), (B) Macrophages (CD11b<sup>+</sup>F4/80<sup>+</sup>Ly6G<sup>-</sup>), (C)  
39 MDSCs (CD11b<sup>+</sup>F4/80<sup>-</sup>Ly6G<sup>+</sup>), (D) CD4<sup>+</sup> T cells, and (E) CD8<sup>+</sup> T cells in the liver, spleen  
40 and lung of control and hCXCR1<sup>tg</sup> mice were determined by flow cytometry. (Data are  
41 presented as mean ± SEM. Student's t test \*p<0.05, \*\*p<0.01)

42 **Supplementary Figure 6. IL-8-CXCR1 does not affect the infiltration of macrophages**  
43 **and MDSCs in the orthotopic model.**

44 (A, B) The indicted Hepa1-6 cells were orthotopically implanted into the liver of control and  
45 hCXCR1<sup>tg</sup> mice (n=4 in each group). The livers and spleens were collected after 2 weeks.  
46 Flow cytometric analysis the (A) macrophages (CD11b<sup>+</sup>F4/80<sup>+</sup>Ly6G<sup>-</sup>) and (B) MDSCs  
47 (CD11b<sup>+</sup>F4/80<sup>-</sup>Ly6G<sup>+</sup>) proportion in the tumor and spleen of the indicated groups.

48

49

50
